# Supplementary material
Source: publisher figshare collection journal article supplement (https://acs.figshare.com/ndownloader/files/16108781)
Supplement: Supplementary file 1 [file 16108781]

## **SUPPORTING INFORMATION**

### **Removal of a Conserved Disulfide Bond Does Not Compromise Mechanical Stability of a VHH Antibody Complex**

*Haipei Liu<sup>1,2</sup>, Valentin Schittny<sup>1,2</sup>, and Michael A. Nash<sup>1,2</sup> \**

<sup>1</sup>Department of Chemistry, University of Basel, 4058 Basel, Switzerland

<sup>2</sup>Department of Biosystems Science and Engineering, ETH Zurich, 4058 Basel, Switzerland

\*Correspondence to: [michael.nash@unibas.ch](mailto:michael.nash@unibas.ch)

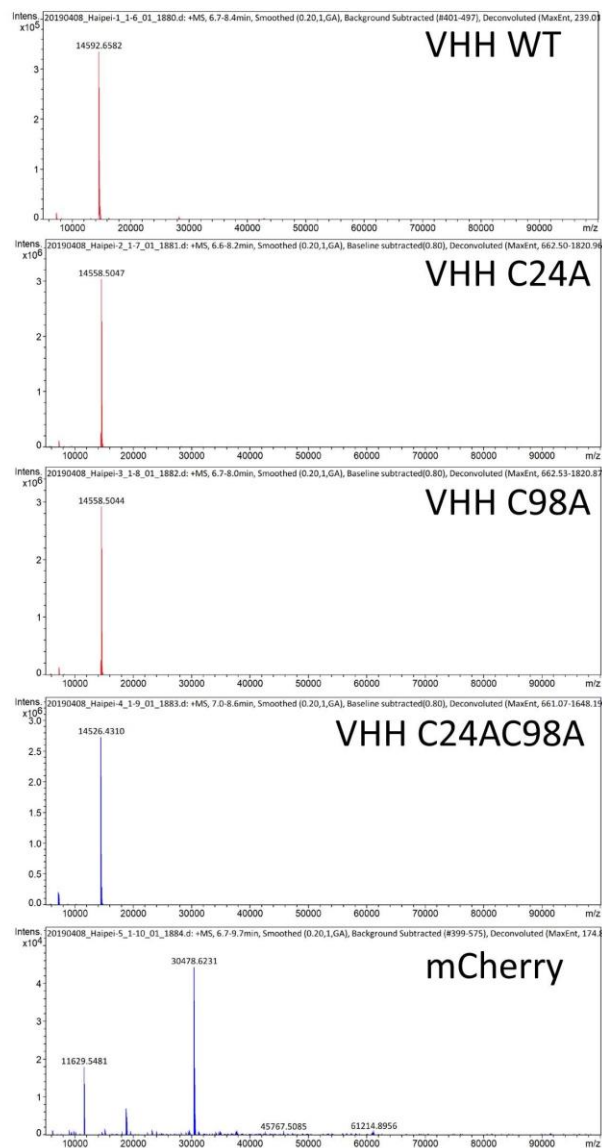

**Supplementary Figure 1.** Mass spectrometry results on VHH(WT), VHH(C24A), VHH(C98A), VHH(C24AC96A) and mCherry.

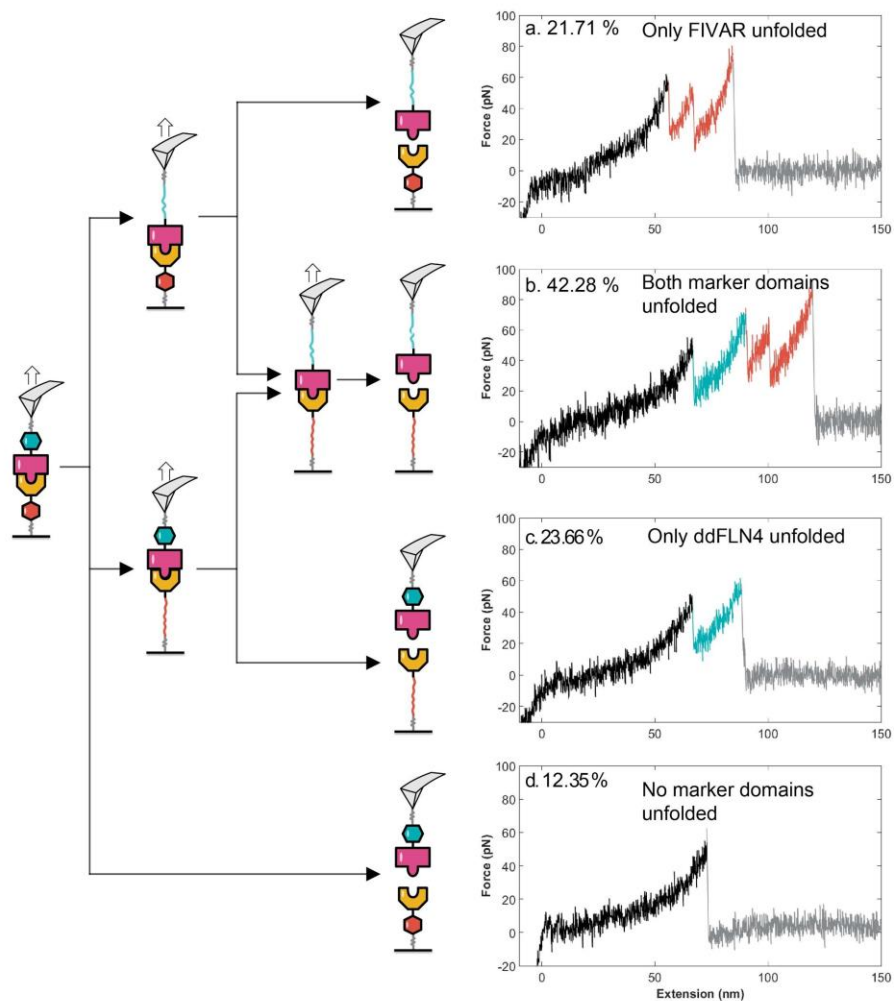

**Supplementary Figure 2.** Representative force vs. extension curves showing various unfolding pathways occurring prior to VHH:mCherry complex rupture. Orange, ddFLN4; Blue, FIVAR.

| Sample          | Condition     | Abs @ 412 nm | Free Cys % | Disulfide % |
|-----------------|---------------|--------------|------------|-------------|
| <b>VHH</b>      | PBS           | 0.60         | 17.5       | 82.5        |
|                 | 6M GuHCl, PBS | 0.37         | 24.2       | 75.8        |
| <b>C24A</b>     | PBS           | 1.52         | 87.7       | ND          |
|                 | 6M GuHCl, PBS | 0.79         | 96.3       | ND          |
| <b>C98A</b>     | PBS           | 1.65         | 107.7      | ND          |
|                 | 6M GuHCl, PBS | 0.81         | 102.8      | ND          |
| <b>C24AC98A</b> | PBS           | 0.03         | ND         | ND          |
|                 | 6M GuHCl, PBS | 0.01         | ND         | ND          |

**Supplementary Table 1.** Quantification of disulfide bond content in purified VHH(WT) and VHH mutants expressed in *E. coli* SHuffle cells. Phosphate buffered saline (PBS); Guanidinium hydrochloride (GuHCl); Not detected (ND).

## Materials and Methods

### *Materials*

Sodium dodecyl sulfate(SDS), N-hydroxysuccinimid(NHS), sodium hydroxide and ethanolamine hydrochloride were purchased from Sigma-Aldrich cooperation (St. Louis, Missouri, USA). The SPR chips (carboxymethyl-dextran, 200nm) and 1-Ethyl-3-(3-dimethylaminopropyl)carbodiimide (EDC) were ordered from XanTec bioanalytics GmbH (Düsseldorf, Germany).

### *Cloning of mCherry-FIVAR-His-ybbR and VHH-ddFLN4-His-ybbR*

The plasmid pET28a\_ybbr-HIS-ddFLN4-8GS-FIVAR-Doc was a gift from Hermann Gaub and Lukas Milles<sup>1</sup> at Ludwig-Maximilians-Universität Munich. A pBAD vector encoding mCherry was obtained from Addgene (plasmid #54630; depositing labs: Michael Davidson, Roger Tsien<sup>2</sup>). The pET28a vector containing the FIVAR marker domains, and a pET28a receiver plasmid containing a previously cloned C-terminal His-ybbR were subjected to Gibson Assembly<sup>3</sup> to build the mCherry-FIVAR-His-ybbR construct. The gene encoding the anti-mCherry VHH domain (LaM-4, Addgene #70696; depositing labs: Kazuhisa Nakayama)<sup>4,5</sup> was cloned with ddFLN4, followed by a C-terminal His-ybbR tag into pET28a vectors again by Gibson Assembly. Gene sequences lacking the ddFLN4 and FIVAR marker domains were made from the AFM genes by full plasmid PCR and PCR product circularization ligation. All sequences were verified by Sanger sequencing.

### ***Site-directed mutagenesis***

A Q5 site-directed mutagenesis kit (New England BioLabs) was used to mutate the two cysteines (C24 and C98) in VHH(WT) to alanine. Three constructs were made: VHH(C24A)-ddFLN4, VHH(C98A)-ddFLN4, and VHH(C24A, C98A)-ddFLN4. All mutagenesis products were confirmed by Sanger sequencing.

VHH(C24A)-ddFLN4 was constructed using the following primers:

5'-GCGGCAGCAAGCGGTCGTTTTGCAG-3'

5'-GCTCAGACGCAGACTACCACCAG-3'

VHH(C98A)-ddFLN4 and VHH(C24A, C98A)-ddFLN4 were from starting plasmids VHH(WT) and VHH(C24A), respectively, using the following primers:

5'-AGTGTATTATGCGGCAGCCAATCTGGGTAAC-3'

5'-GCGGTATCATCCGGTTTC-3'

### ***Protein expression and purification***

mCherry-FIVAR was expressed in *E. coli* BL21(DE3) in TB<sup>kan</sup> medium using 0.5 mM IPTG induction at 37°C for 4 hrs. The VHH(WT) and VHH mutants C24A, C98A and C24A/C98A with and without SMFS marker domains were expressed in *E. coli* SHuffle cells in LB<sup>kan</sup> medium using 0.4 mM IPTG at 16°C overnight. Cells were lysed by sonication and the His<sub>6</sub>-tagged proteins were purified using a His-Trap FF column, followed by desalting using a His-Trap Desalting column on AKTA Pure system followed by size exclusion. Protein concentrations were determined by absorbance at 280 nm.

### ***AFM Sample Preparation***

Ybbr tagged proteins were immobilized on functionalized AFM cantilevers and cover glasses according to previously published protocols<sup>6,7</sup>. In brief, AFM cantilevers and coverglasses were first cleaned by UV-ozone treatment for 40 minutes followed by soaking in piranha etching solution and rinsing in water. Next, levers and coverglasses were treated with 3-Aminopropyl (diethoxy) methylsilane (APDMES, ABCR GmbH, Karlsruhe, Germany) to silanize the surface with amine groups. The amine groups were subsequently conjugated to a heterobifunctional NHS-PEG-Mal linker (5 kDa; Rapp Polymere, Tübingen, Germany) in 50 mM HEPES buffer pH 7.5 for 30 min, followed by incubating with Coenzyme A (CoA, 200  $\mu$ M) in coupling buffer (50mM sodium phosphate, 50mM NaCl, 10mM EDTA, pH 7.2) for 2 hours at room temperature. Finally, the ybbr tagged proteins mCherry-FIVAR and VHH-ddFLN4 were covalently immobilized to the CoA surfaces or cantilevers by a Sfp-catalyzed coupling reaction in PBS measurement buffer (137 mM NaCl, 2.7 mM KCl, 10 mM Na<sub>2</sub>HPO<sub>4</sub> , 2 mM KH<sub>2</sub>PO<sub>4</sub>, pH 7.4) at room temperature for 2 hours. This resulted in covalent and site-specific surface immobilization through the ybbR tag located at the C-terminus of the marker domains. Functionalized cantilevers and coverglasses were washed extensively and kept in PBS buffer prior to immediate use.

### ***AFM-SMFS measurements and data analysis***

Force spectroscopy was conducted using automated AFM-based SMFS (Force Robot 300, JPK Instruments). SMFS data were recorded in PBS buffer (137 mM NaCl, 2.7 mM KCl, 10 mM Na<sub>2</sub>HPO<sub>4</sub> , 2 mM KH<sub>2</sub>PO<sub>4</sub>, pH 7.4), at room temperature and constant pulling speeds of 400 nm/s, 800 nm/s, 1600 nm/s and 3200 nm/s. Force vs. extension curves were filtered and analysed using a combination of software available on the AFM instrument and custom python scripts. Data traces

were filtered by searching for contour length increments that matched the characteristics of unfolding of the specific marker domains. FIVAR has a single contour length increment of around 28 nm and ddFLN4 has two contour length increments around 15 nm and 17 nm following a two-step unfolding pathway with an intermediate state. Dynamic force spectroscopy results from different pulling speeds were fitted with Dudko–Hummer–Szabo model with a cusp-like barrier<sup>8,9</sup> to determine values of energy barrier heights ( $\Delta G^\ddagger$ ), effective distance to the transition state ( $\Delta x$ ) and the intrinsic off-rate ( $k_{off}$ ).

### ***SPR experiments***

SPR measurements were conducted on an SR7500DC instrument (Reichert technologies inc., Depew, New York, USA). Prior to use, the system was first flushed with 0.5% (m/m) SDS solution, followed by glycine (50 mM, pH 9.5) and deionized water. The system was conditioned with immobilization buffer (Acetate buffer, 10 mM, pH 3.9) and a new chip was installed. To activate the carboxylated dextran surface, a freshly prepared solution containing 0.23 M EDC and 0.095 M NHS was injected at 10  $\mu\text{L min}^{-1}$  for 5 minutes. Subsequently, a 20  $\mu\text{M}$  VHH(WT) or VHH mutant solution in immobilization buffer was injected for 20 minutes to immobilize the VHH domain on the chip. Thereafter, the remaining activated carboxylic groups blocked by injecting ethanolamine hydrochloride (1M, pH 8.5) for 5 minutes. The system was then conditioned with PBS prior to the kinetic analysis. To measure binding kinetics, buffer (1x PBS) was injected for 5 min at a flow rate of 30  $\mu\text{L min}^{-1}$ , followed by the analyte mCherry at 30  $\mu\text{L min}^{-1}$  for 2.5 minutes. For dissociation, the running buffer (1x PBS) was perfused at 30  $\mu\text{L min}^{-1}$  for 5 minutes. To completely remove the analyte from the surface, a sodium hydroxide solution (10 mM) was injected at 50  $\mu\text{L min}^{-1}$  to regenerate the surface for 2 minutes. This cycle was repeated six times,



once for each concentration of analyte, starting with low concentrations (see Supplementary Table 2).

| Injection number                | 1   | 2   | 3   | 4   | 5   | 6   |
|---------------------------------|-----|-----|-----|-----|-----|-----|
| Concentration [ $\mu\text{M}$ ] | 0.5 | 1.0 | 1.5 | 2.0 | 2.5 | 3.0 |

**Supplementary Table 2.** Injection concentrations for the SPR experiment.

The raw data of the SPR was extracted, fitted and evaluated in the software package Origin. The dissociation constant ( $k_{off}$ ) was fitted globally over the curves using Equation 1, which takes the baseline offset  $R_0$  into account. The association constant ( $k_{on}$ ) was extracted by fitting each curve with Equation 2, where the dissociation constant ( $k_{off}$ ) was given as a fixed parameter obtained from the fit with equation (1). The 95%-confidence intervals reported for each sample in the main text Table 1 represent the standard error from 6 curves analyzed.

$$f(t) = (R_{max} - R_0) \cdot e^{-k_{off} \cdot t} + R_0 \quad \text{Eq. 1}$$

$$f(t) = \frac{(R_{max} - R_0)[A]}{\left(\frac{k_{off}}{k_{on}}\right) + [A]} \left(1 - e^{-(k_{on}[A] + k_{off}) \cdot t}\right) + R_0 \quad \text{Eq. 2}$$

### ***Ellman's assay protocol***

Protein samples were prepared at 60-120  $\mu\text{M}$  in phosphate buffered saline (PBS) or in PBS containing additionally 6M guanidinium hydrochloride (6M GuHCl) to denature VHH tertiary structure. Samples were then incubated with Ellman's reagent for 15 minutes at room temperature

and the absorbance was measured at 412 nm (Abs @ 412nm). The concentration of free cysteine was determined based on a calibration curve using free cysteine.

### ***Measurement protocol for ITC***

The binding affinity between mCherry and VHH mutants were measured using an isothermal titration calorimeter (VP200-ITC system, MicroCal LLC). A 15  $\mu$ M solution of VHH was transferred into the sample cell (cell volume 1.42 mL). All ITC measurements were conducted at 25 °C. A 130  $\mu$ M solution of mCherry protein was added to the protein solution by syringe in 1 time 1  $\mu$ L injection followed by 2  $\mu$ L injections every 2 minutes. Data were plotted as the power needed to maintain the reference cell and sample cell at the same temperature against time and as kcal/mol of injectant against the molar ratio of ligand and protein. The data from titrations were then analyzed using Origin7 (OriginLab) and the calculated dissociation constants are summarized in Table 1 in the main text. Each of the 95%-confidence intervals reported in the main text Table 1 represents the fitting error from a single titration curve consisting of 27 injections.

### ***Measurement protocol for nanoDSF***

The melting temperatures ( $T_m$ ) of the samples were measured by nano differential scanning fluorimetry (nanoDSF) using a Prometheus NT.48 system (Nanotemper Technologies) based on a tryptophan fluorescence ratio 350/330 nm. Protein samples were prepared at 0.1 mg/ml in phosphate buffered saline (PBS) before the nano DSF. The protein denaturation curves were determined in a range between 20 °C and 95 °C with a slope of 1 °C/min.  $T_m$  were calculated as the inflection point of the denaturation curve by first derivative analysis. Each sample was measured in triplicate and the 95%-confidence intervals are provided for  $T_m$  reported in Table 1.

*Protein sequences for AFM-SMFS including marker domains:*

VHH(WT)-ddFLN4-His-ybbR:

MAQVQLVESGGSLVQPGGSLRLSCAASGRFAESSMGMWFRQAPGKEREFVAAISWSGG  
ATNYADSAKGRFTLSRDNTKNTVYLQMNSLKPD~~DTAVYY~~CAANLGNYISSNQRLYGY  
WGQGTQVTVSSPFTGSGSGSGSAGTGSGADPEKSYAEGPGLDGGESFQPSKFKIHAVDP  
DGVHRTDGGDGFVVTIEGPAPVDPVMVDNNGDGTVDVEFEPKEAGDYVINLTLDGDNV  
NGFPKTVTVKPAPSGHHHHHHGSDSLEFIASKLA

VHH(C24A)-ddFLN4-His-ybbR:

MAQVQLVESGGSLVQPGGSLRLSAAASGRFAESSMGMWFRQAPGKEREFVAAISWSGG  
ATNYADSAKGRFTLSRDNTKNTVYLQMNSLKPD~~DTAVYY~~CAANLGNYISSNQRLYGY  
WGQGTQVTVSSPFTGSGSGSGSAGTGSGADPEKSYAEGPGLDGGESFQPSKFKIHAVDP  
DGVHRTDGGDGFVVTIEGPAPVDPVMVDNNGDGTVDVEFEPKEAGDYVINLTLDGDNV  
NGFPKTVTVKPAPSGHHHHHHGSDSLEFIASKLA

VHH(C98A)-ddFLN4-His-ybbR:

MAQVQLVESGGSLVQPGGSLRLSCAASGRFAESSMGMWFRQAPGKEREFVAAISWSGG  
ATNYADSAKGRFTLSRDNTKNTVYLQMNSLKPD~~DTAVYY~~AAANLGNYISSNQRLYGY  
WGQGTQVTVSSPFTGSGSGSGSAGTGSGADPEKSYAEGPGLDGGESFQPSKFKIHAVDP  
DGVHRTDGGDGFVVTIEGPAPVDPVMVDNNGDGTVDVEFEPKEAGDYVINLTLDGDNV  
NGFPKTVTVKPAPSGHHHHHHGSDSLEFIASKLA

VHH(C24A, C98A)-ddFLN4-His-ybbR:

MAQVQLVESGGSLVQPGGSLRLSAAASGRFAESSSMGWFRQAPGKEREFVAAISWSGG  
ATNYADSAKGRFTLSRDNTKNTVYLMNSLKPD~~DTAVYY~~AAANLGNYISSNQRLYGY  
WGQGTQVTVSSPFTGSGSGSGSAGTGSGADPEKSYAEGPGLDGGESFQPSKFKIHAVDP  
DGVHRTDGGDGFVVTIEGPAPVDPVMVDNNGDGTVDVEFEPKEAGDYVINLTLDGDNV  
NGFPKTVTVKPAPSGHHHHHHGSDSLEFIASKLA

mCherry-FIVAR-His-ybbR:

MVSKGEEDNMAIIKEFMRFKVHMEGSVNGHEFEIEGEGEGRPYEGTQTAKLKVTKGGP  
LPFAWDILSPQFMYGSKAYVKHPADIPDYLKLSFPEGFKWERVMNFEDGGVVTVTQDS  
SLQDGEFIYKVKLRGTNFPSDGPVMQKKTMGWEASSERMYPEDGALKGEIKQRLKLD  
GGHYDAEVKTTYKAKKPVQLPGAYNVNIKLDITSHNEDYTIVEQYERAEGRHSTGGMD  
ELYKGSGSGSGSDKTNLGELINQGKSLDESVEGFNVGEYHKGAKDGLTVEINKAEEVF  
NKEDATEEEINLAKESLEGAIRFNSLLIEESTGSVVPGWLHHHHHHGSDSLEFIASKLA

*Protein sequences for ITC, SPR, and DSF:*

VHH(WT)-His:

MAQVQLVESGGSLVQPGGSLRLSCAASGRFAESSSMGWFRQAPGKEREFVAAISWSGG  
ATNYADSAKGRFTLSRDNTKNTVYLMNSLKPD~~DTAVYY~~CAANLGNYISSNQRLYGY  
WGQGTQVTVSSPFTHHHHHH

VHH(C24A)-His:

MAQVQLVESGGSLVQPGGSLRLSAAASGRFAESSMGWFRQAPGKEREFVAAISWSGG  
ATNYADSAKGRFTLSRDNTKNTVYLMNSLKPD<sup>DT</sup>AVYYCAANLGNYISSNQRLYGY  
WGQGTQVTVSSPFTHHHHHH

VHH(C98A)-His:

MAQVQLVESGGSLVQPGGSLRLSCAASGRFAESSMGWFRQAPGKEREFVAAISWSGG  
ATNYADSAKGRFTLSRDNTKNTVYLMNSLKPD<sup>DT</sup>AVYYAAANLGNYISSNQRLYGY  
WGQGTQVTVSSPFTHHHHHH

VHH(C24A, C98A)-His:

MAQVQLVESGGSLVQPGGSLRLSAAASGRFAESSMGWFRQAPGKEREFVAAISWSGG  
ATNYADSAKGRFTLSRDNTKNTVYLMNSLKPD<sup>DT</sup>AVYYAAANLGNYISSNQRLYGY  
WGQGTQVTVSSPFTHHHHHH

His-mCherry:

HHHHHHHGMASMTGGQQMGRDLYDDDDKDPSSMVSKEEDNMAIIKEFMRFKVHME  
GSVNGHEFEIEGEGEGRPYEGTQTAKLKVTGGPLPFAWDILSPQFMYGSKAYVKHPA  
DIPDYLKLSFPEGFKWERVMNFEDGGVVTVTQDSSLQDGEFIYKVKLRGTNFPDGPVM  
QKKTMGWEASSERMYPEDGALKGEIKQRLKLKDGGHYDAEVKTTYKAKKPVQLPGA  
YNVNIKLDITSHNEDYTIVEQYERAEGRHSTGGMDELYK



## References

- (1) Milles, L. F.; Bayer, E. A.; Nash, M. A.; Gaub, H. E. Mechanical Stability of a High-Affinity Toxin Anchor from the Pathogen *Clostridium Perfringens*. *J. Phys. Chem. B* **2017**, *121* (15), 3620–3625.
- (2) Shaner, N. C.; Campbell, R. E.; Steinbach, P. A.; Giepmans, B. N. G.; Palmer, A. E.; Tsien, R. Y. Improved Monomeric Red, Orange and Yellow Fluorescent Proteins Derived from *Discosoma Sp.* Red Fluorescent Protein. *Nat. Biotechnol.* **2004**, *22* (12), 1567–1572.
- (3) Gibson, D. G.; Young, L.; Chuang, R.-Y.; Venter, J. C.; Hutchison, C. A., 3rd; Smith, H. O. Enzymatic Assembly of DNA Molecules up to Several Hundred Kilobases. *Nat. Methods* **2009**, *6* (5), 343–345.
- (4) Fridy, P. C.; Li, Y.; Keegan, S.; Thompson, M. K.; Nudelman, I.; Scheid, J. F.; Oeffinger, M.; Nussenzweig, M. C.; Fenyö, D.; Chait, B. T.; et al. A Robust Pipeline for Rapid Production of Versatile Nanobody Repertoires. *Nat. Methods* **2014**, *11* (12), 1253–1260.
- (5) Katoh, Y.; Terada, M.; Nishijima, Y.; Takei, R.; Nozaki, S.; Hamada, H.; Nakayama, K. Overall Architecture of the Intraflagellar Transport (IFT)-B Complex Containing Cluap1/IFT38 as an Essential Component of the IFT-B Peripheral Subcomplex. *J. Biol. Chem.* **2016**, *291* (21), 10962–10975.
- (6) Liu, H.; Ta, D. T.; Nash, M. A. Mechanical Polyprotein Assembly Using Sfp and Sortase-Mediated Domain Oligomerization for Single-Molecule Studies. *Small Methods* **2018**, 1800039.
- (7) Jobst, M. A.; Schoeler, C.; Malinowska, K.; Nash, M. A. Investigating Receptor-Ligand Systems of the Cellulosome with AFM-Based Single-Molecule Force Spectroscopy. *J. Vis. Exp.* **2013**, No. 82, e50950.
- (8) Dudko, O. K.; Hummer, G.; Szabo, A. Theory, Analysis, and Interpretation of Single-Molecule Force Spectroscopy Experiments. *Proc. Natl. Acad. Sci. U. S. A.* **2008**, *105* (41), 15755–15760.
- (9) Dudko, O. K. Decoding the Mechanical Fingerprints of Biomolecules. *Q. Rev. Biophys.* **2016**, *49*, e3.
